# Supplementary material
Source: PubMed Central journal article supplement (PMC5426538)
Supplement: NIHMS72631-supplement-Supplementary_data.pdf [file NIHMS72631-supplement-Supplementary_data.pdf]

**Supplementary Material**

**Maternal plasma n-3 and n-6 polyunsaturated fatty acid concentrations during pregnancy and subcutaneous fat mass in infancy.**

Aleksandra Jelena Vidakovic MD, Susana Santos MSc, Michelle A. Williams PhD, Liesbeth Duijts MD PhD, Albert Hofman MD PhD, Hans Demmelmair PhD, Berthold Koletzko MD PhD

Dr h.c., Vincent WV Jaddoe MD PhD, Romy Gaillard PhD

**Address reprint requests and correspondence to:** Romy Gaillard, PhD. The Generation R Study Group (Na29-15). Erasmus MC, University Medical Center, PO Box 2040, 3000 CA Rotterdam, the Netherlands ([r.gaillard@erasmusmc.nl](mailto:r.gaillard@erasmusmc.nl)). Phone: +31 (0) 10 7043405, Fax: +31 (0) 10 7044645

**Figure S1** Flow chart of the participants

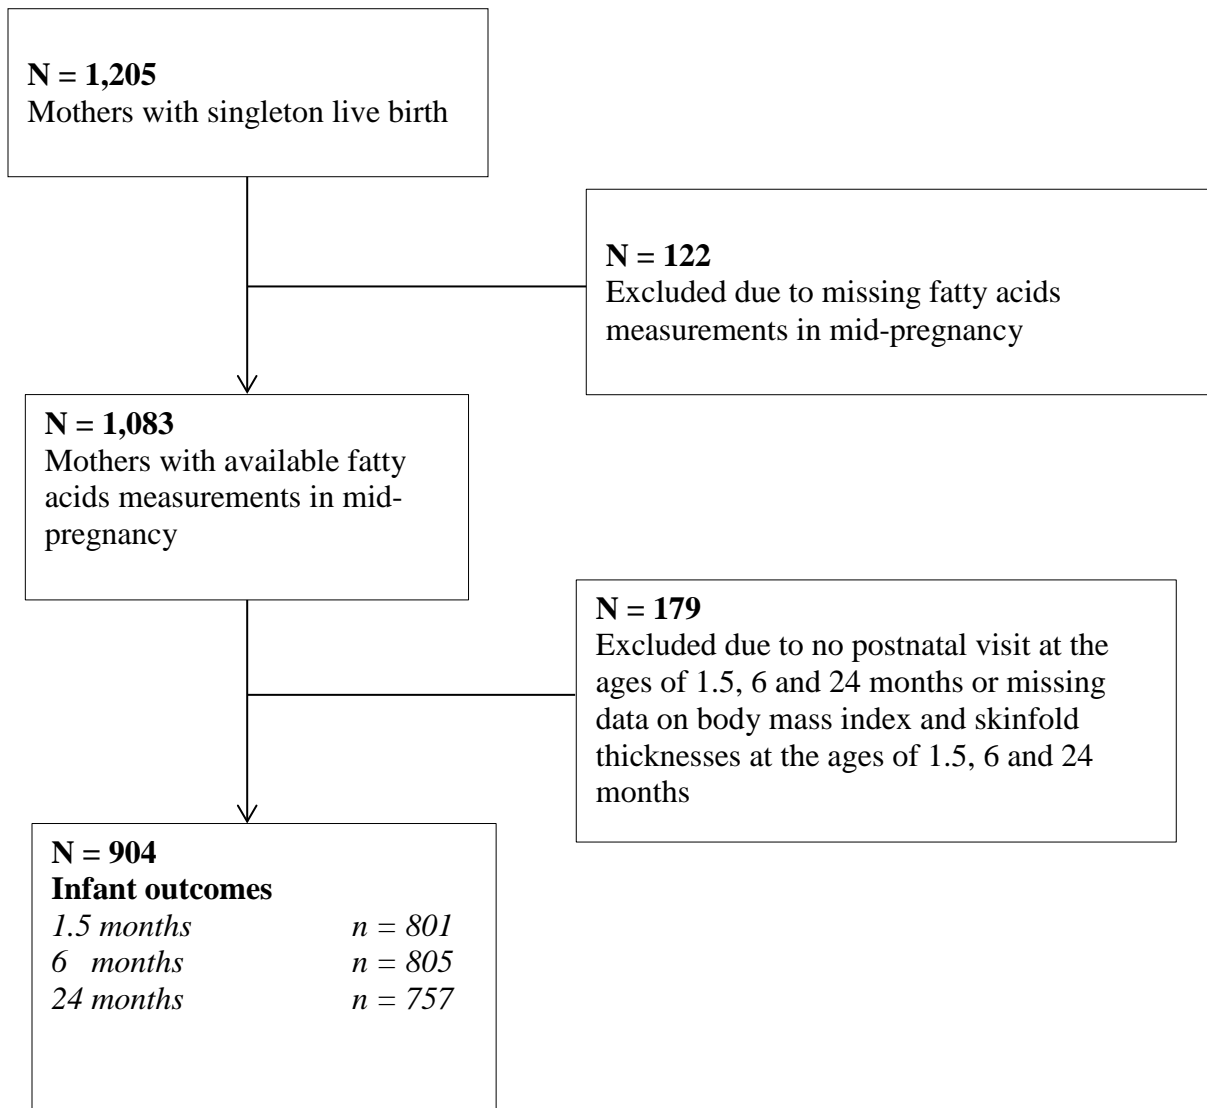

**Table S1** Comparison of subject characteristics between those included and not included in the analyses (N = 1,083)<sup>1</sup>

| Characteristics                                               | Participation in follow-up | No participation in follow-up | P-value |
|---------------------------------------------------------------|----------------------------|-------------------------------|---------|
|                                                               | N = 904                    | N = 179                       |         |
| <b>Maternal characteristics</b>                               |                            |                               |         |
| Age (years), mean (SD)                                        | 31.9 (4.0)                 | 30.7 (4.1)                    | <0.01   |
| Gestational age at PUFA measures (weeks), median (95% range)  | 20.5 (18.6, 22.7)          | 20.5 (18.6, 22.6)             | 0.56    |
| Pre-pregnancy body mass index (kg/m <sup>2</sup> ), mean (SD) | 23.4 (4.1)                 | 23.5 (4.3)                    | 0.73    |
| Gestational weight gain, kg, mean (SD)                        | 10.0 (4.5)                 | 10.4 (4.7)                    | 0.54    |
| Education, n (%) higher education                             | 574 (64.0)                 | 102 (58.0)                    | 0.13    |
| Parity, n (%) nulliparous                                     | 555 (61.4)                 | 98 (55.4)                     | 0.07    |
| Total energy intake, kcal, mean (SD)                          | 2126 (486)                 | 2167 (497)                    | 0.41    |
| Smoking during pregnancy, n yes (%)                           | 198 (24.1)                 | 45 (27.1)                     | 0.22    |
| Folic acid supplement use, n yes (%)                          | 676 (90.7)                 | 139 (90.2)                    | 0.35    |
| Gestational diabetes, n (%)                                   | 10 (1.1)                   | 1 (0.6)                       | 0.45    |
| Gestational hypertensive disorders, n (%)                     | 67 (7.6)                   | 7 (4.1)                       | 0.15    |
| <b>Infant characteristics</b>                                 |                            |                               |         |
| Males, n (%)                                                  | 464 (51.3)                 | 98 (55.1)                     | 0.34    |
| Gestational age at birth (weeks), median (95% range )         | 40.3 (35.8, 42.4)          | 40.3 (34.8, 42.2)             | 0.66    |
| Birth weight (g), mean (SD)                                   | 3509 (544)                 | 3513 (591)                    | 0.82    |
| Breastfeeding duration (months), mean (SD)                    | 4.5 (3.8)                  | 3.5 (3.6)                     | 0.01    |
| Introduction of solid foods n (%) >6 months                   | 147 (18.3)                 | 11 (8.9)                      | 0.07    |

<sup>1</sup>Values represent mean (SD), median (95% range) or number of subjects (valid %). Differences were tested using Student's t-tests and Mann-Whitney tests for normally and non-normally distributed variables, respectively and  $\chi^2$ -test for dichotomous variables.

Abbreviations: PUFA; polyunsaturated fatty acid; SD: standard deviation.

**Table S2** Comparison of maternal PUFA between those included and not included in the analyses (N = 1,083)<sup>1</sup>

| Maternal PUFA                                    | Participation in follow-up<br>N = 904 | No participation in follow-up<br>N = 179 | P-value         |
|--------------------------------------------------|---------------------------------------|------------------------------------------|-----------------|
| <b>Total PUFA</b>                                |                                       |                                          |                 |
| Absolute values (mg/L)                           | 704.1 (95.4)                          | 702.3 (90.7)                             | 0.86            |
| Percentage by weight of total sum of fatty acids | 42.5 (1.6)                            | 42.3 (1.7)                               | 0.10            |
| <b>Total n-3 PUFA</b>                            |                                       |                                          |                 |
| Absolute values (mg/L)                           | 111.4 (25.8)                          | 107.5 (25.3)                             | 0.07            |
| Percentage by weight of total sum of fatty acids | 6.8 (1.4)                             | 6.6 (1.4)                                | <b>0.01</b>     |
| <b>ALA</b>                                       |                                       |                                          |                 |
| Absolute values (mg/L)                           | 5.4 (1.6)                             | 5.3 (1.7)                                | 0.49            |
| Percentage by weight of total sum of fatty acids | 0.3 (0.1)                             | 0.3 (0.1)                                | 0.25            |
| <b>EPA</b>                                       |                                       |                                          |                 |
| Absolute values (mg/L)                           | 10.1 (5.3)                            | 9.8 (5.5)                                | 0.45            |
| Percentage by weight of total sum of fatty acids | 0.6 (0.3)                             | 0.6 (0.3)                                | 0.33            |
| <b>DPA</b>                                       |                                       |                                          |                 |
| Absolute values (mg/L)                           | 12.9 (3.9)                            | 13.2 (4.3)                               | 0.28            |
| Percentage by weight of total sum of fatty acids | 0.8 (0.2)                             | 0.8 (0.2)                                | 0.41            |
| <b>DHA</b>                                       |                                       |                                          |                 |
| Absolute values (mg/L)                           | 81.5 (19.2)                           | 77.9 (19.5)                              | 0.02            |
| Percentage by weight of total sum of fatty acids | 5.0 (1.1)                             | 4.7 (1.1)                                | <b>&lt;0.01</b> |
| <b>Total n-6 PUFA</b>                            |                                       |                                          |                 |
| Absolute values (mg/L)                           | 592.6 (86.0)                          | 595.4 (80.8)                             | 0.45            |
| Percentage by weight of total sum of fatty acids | 36.3 (2.0)                            | 36.3 (2.0)                               | 0.52            |
| <b>LA</b>                                        |                                       |                                          |                 |
| Absolute values (mg/L)                           | 348.9 (59.6)                          | 348.7 (55.2)                             | 0.96            |
| Percentage by weight of total sum of fatty acids | 21.4 (2.5)                            | 21.3 (2.5)                               | 0.65            |
| <b>GLA</b>                                       |                                       |                                          |                 |
| Absolute values (mg/L)                           | 1.5 (0.7)                             | 1.5 (0.7)                                | 0.38            |
| Percentage by weight of total sum of fatty acids | 0.1 (0.0)                             | 0.1 (0.0)                                | 0.46            |
| <b>EDA</b>                                       |                                       |                                          |                 |
| Absolute values (mg/L)                           | 8.3 (1.7)                             | 8.3 (1.7)                                | 0.85            |
| Percentage by weight of total sum of fatty acids | 0.5 (0.1)                             | 0.5 (0.1)                                | 0.44            |
| <b>DGLA</b>                                      |                                       |                                          |                 |
| Absolute values (mg/L)                           | 63.3 (16.3)                           | 64.5 (17.0)                              | 0.22            |
| Percentage by weight of total sum of fatty acids | 3.9 (0.7)                             | 3.9 (0.7)                                | 0.26            |
| <b>ARA</b>                                       |                                       |                                          |                 |
| Absolute values (mg/L)                           | 155.9 (31.7)                          | 157.1 (30.9)                             | 0.37            |
| Percentage by weight of total sum of fatty acids | 9.5 (1.4)                             | 9.6 (1.4)                                | 0.53            |
| <b>DTA</b>                                       |                                       |                                          |                 |
| Absolute values (mg/L)                           | 6.9 (2.0)                             | 7.2 (2.3)                                | <b>0.01</b>     |
| Percentage by weight of total sum of fatty acids | 0.42 (0.1)                            | 0.4 (0.1)                                | <b>0.01</b>     |

<sup>1</sup>Values represent mean (SD). Differences were tested using Student's t-tests and Mann-Whitney tests for normally and non-normally distributed variables, respectively and  $\chi^2$ -test for dichotomous variables. Abbreviations: ALA:  $\alpha$ -linolenic acid; AA: arachidonic acid; DGLA dihomogamma-linolenic acid; DHA: docosahexaenoic acid; DPA: docosapentaenoic acid; DTA: docosatetraenoic acid; EDA: eicosadienoic acid; EPA: eicosapentaenoic acid; GLA:  $\gamma$ -linolenic acid; LA: linoleic acid; PUFA: polyunsaturated fatty acid.

**Table S3** Correlation between all maternal fatty acid concentrations<sup>1</sup>

| Maternal PUFA  | Total PUFA | Total n-3 PUFA | ALA    | EPA    | DPA    | DHA     | Total n-6 PUFA | LA     | GLA    | EDA    | DGLA   | ARA   | DTA |
|----------------|------------|----------------|--------|--------|--------|---------|----------------|--------|--------|--------|--------|-------|-----|
| Total PUFA     | 1          |                |        |        |        |         |                |        |        |        |        |       |     |
| Total n-3 PUFA | 0.11*      | 1              |        |        |        |         |                |        |        |        |        |       |     |
| ALA            | -0.01      | 0.04           | 1      |        |        |         |                |        |        |        |        |       |     |
| EPA            | 0.02       | 0.73*          | 0.12*  | 1      |        |         |                |        |        |        |        |       |     |
| DPA            | -0.08*     | 0.56*          | 0.11*  | 0.38*  | 1      |         |                |        |        |        |        |       |     |
| DHA            | 0.15*      | 0.96*          | -0.09* | 0.55*  | 0.40*  | 1       |                |        |        |        |        |       |     |
| Total n-6 PUFA | 0.72*      | -0.61*         | -0.05  | -0.50* | -0.44* | -0.55*  | 1              |        |        |        |        |       |     |
| LA             | 0.64*      | -0.40*         | 0.21*  | -0.31* | -0.35* | -0.37*  | 0.76*          | 1      |        |        |        |       |     |
| GLA            | -0.44*     | -0.06          | 0.01   | 0.03   | 0.15*  | -0.12*  | -0.29*         | -0.42* | 1      |        |        |       |     |
| EDA            | 0.10*      | -0.23*         | 0.19*  | -0.19* | -0.18* | -0.22*  | 0.23*          | 0.34*  | -0.21* | 1      |        |       |     |
| DGLA           | -0.37*     | -0.31*         | -0.03  | -0.16* | -0.09* | -0.33*  | -0.07          | -0.28* | 0.29*  | 0.29*  | 1      |       |     |
| ARA            | 0.14*      | 0.04           | -0.40* | -0.04  | 0.01   | 0.09*   | 0.12*          | -0.46* | 0.12*  | -0.44* | -0.19* | 1     |     |
| DTA            | -0.33*     | -0.21*         | -0.14* | -0.20* | 0.24*  | -0.24** | -0.07*         | -0.46* | 0.37*  | -0.09* | 0.33*  | 0.38* | 1   |

<sup>1</sup>Values are Pearson correlation coefficients. \*P- value <0.06.

Abbreviations: ALA:  $\alpha$ -linolenic acid; AA: arachidonic acid; DGLA dihomogamma-linolenic acid; DHA: docosahexaenoic acid; DPA: docosapentaenoic acid; DTA: docosatetraenoic acid; EDA: eicosadienoic acid; EPA: eicosapentaenoic acid; GLA:  $\gamma$ -linolenic acid; LA: linoleic acid; PUFA; polyunsaturated fatty acid;

**Table S4** Association of maternal n-3 PUFA levels and infant subcutaneous fat mass measures at 1.5, 6 and 24 (N =904)<sup>1-2</sup>

| Maternal n-3 PUFA in SDS | Adiposity measures at 1.5 months in SDS<br>Difference (95% confidence interval) |                             |                                              | Adiposity measures at 6 months in SDS<br>Difference (95% confidence interval) |                             |                                              | Adiposity measures at 24 months in SDS<br>Difference (95% confidence interval) |                             |                                              |
|--------------------------|---------------------------------------------------------------------------------|-----------------------------|----------------------------------------------|-------------------------------------------------------------------------------|-----------------------------|----------------------------------------------|--------------------------------------------------------------------------------|-----------------------------|----------------------------------------------|
|                          | Body mass index                                                                 | Total subcutaneous fat mass | Central-to-total subcutaneous fat mass ratio | Body mass index                                                               | Total subcutaneous fat mass | Central-to-total subcutaneous fat mass ratio | Body mass index                                                                | Total subcutaneous fat mass | Central-to-total subcutaneous fat mass ratio |
| <b>Total</b>             | -0.01<br>(-0.07, 0.07)                                                          | -0.04<br>(-0.12, 0.03)      | 0.10<br>(0.03, 0.17)*                        | -0.04 (-0.11, 0.04)                                                           | -0.03 (-0.10, 0.04)         | -0.08 (-0.15, -0.01)*                        | 0.02<br>(-0.05, 0.10)                                                          | 0.06<br>(-0.02, 0.14)       | -0.03<br>(-0.10, 0.05)                       |
| <i>ALA</i>               | 0.04<br>(-0.03, 0.11)                                                           | -0.05<br>(-0.12, 0.03)      | 0.03<br>(-0.05, 0.10)                        | -0.03 (-0.10, 0.04)                                                           | 0.01 (-0.06, 0.08)          | -0.01 (-0.08, 0.06)                          | -0.03<br>(-0.10, 0.04)                                                         | -0.01<br>(-0.08, 0.07)      | -0.03<br>(-0.10, 0.04)                       |
| <i>EPA</i>               | -0.01<br>(-0.07, 0.06)                                                          | -0.02<br>(-0.09, 0.05)      | 0.07<br>(0.01, 0.14)*                        | -0.02 (-0.09, 0.06)                                                           | -0.03 (-0.10, 0.04)         | -0.07 (-0.14, 0)*                            | 0.02<br>(-0.06, 0.10)                                                          | 0.04<br>(-0.04, 0.12)       | -0.01<br>(-0.09, 0.07)                       |
| <i>DPA</i>               | 0.01<br>(-0.06, 0.08)                                                           | -0.13<br>(-0.20, -0.06)*    | 0.11<br>(0.04, 0.19)*                        | -0.07 (-0.14, -0.01)*                                                         | -0.06 (-0.13, 0.01)         | -0.01 (-0.07, 0.07)                          | -0.08<br>(-0.15, -0.01)*                                                       | 0.02<br>(-0.06, 0.09)       | -0.07<br>(-0.14, 0.01)                       |
| <i>DHA</i>               | -0.01<br>(-0.08, 0.06)                                                          | -0.02<br>(-0.09, 0.05)      | 0.09<br>(0.02, 0.16)*                        | -0.02 (-0.09, 0.05)                                                           | -0.02 (-0.09, 0.06)         | -0.08 (-0.15, -0.01)*                        | 0.04<br>(-0.03, 0.12)                                                          | 0.06<br>(-0.02, 0.14)       | -0.02<br>(-0.10, 0.06)                       |

<sup>1</sup>Values are regression coefficients (95% Confidence Interval) that reflect the difference in SDS of infant body mass index and subcutaneous fat mass measures from 1.5 to 24 months per SD change in maternal n-3 PUFA levels. Body mass index = weight/height<sup>2</sup>. Total subcutaneous fat mass = biceps + triceps + suprailiacal + subscapular skinfold thicknesses. Central-to-total subcutaneous fat mass ratio = (suprailiacal + subscapular skinfold thicknesses)/total subcutaneous fat mass.

<sup>2</sup>Models are unadjusted for potential confounders. \* P-value<0.05.

**Table S5** Association of maternal n-3 PUFA levels and change in fat mass measures from 1.5 to 24 months (N =904)<sup>1-2</sup>

| Maternal n-3 PUFA in SDS | Change in adiposity measures from 1.5 to 6 months in SDS |                             |                                              | Change in adiposity measures from 1.5 to 24 months in SDS |                             |                                              | Change in adiposity measures from 6 to 24 months in SDS |                             |                                              |
|--------------------------|----------------------------------------------------------|-----------------------------|----------------------------------------------|-----------------------------------------------------------|-----------------------------|----------------------------------------------|---------------------------------------------------------|-----------------------------|----------------------------------------------|
|                          | Difference (95% confidence interval)                     |                             |                                              | Difference (95% confidence interval)                      |                             |                                              | Difference (95% confidence interval)                    |                             |                                              |
|                          | Body mass index                                          | Total subcutaneous fat mass | Central-to-total subcutaneous fat mass ratio | Body mass index                                           | Total subcutaneous fat mass | Central-to-total subcutaneous fat mass ratio | Body mass index                                         | Total subcutaneous fat mass | Central-to-total subcutaneous fat mass ratio |
| <b>Total</b>             |                                                          |                             |                                              |                                                           |                             |                                              |                                                         |                             |                                              |
| <i>Unadjusted</i>        | -0.04<br>(-0.11, 0.04)                                   | 0.03<br>(-0.07, 0.13)       | 0.03<br>(-0.07, 0.13)                        | 0.03<br>(-0.07, 0.13)                                     | 0.07<br>(-0.04, 0.18)       | -0.15<br>(-0.27, -0.04)*                     | 0.07<br>(-0.02, 0.15)                                   | 0.04<br>(-0.07, 0.14)       | 0.06<br>(-0.06, 0.17)                        |
| <i>Adjusted</i>          | -0.04<br>(-0.12, 0.04)                                   | 0.01<br>(-0.10, 0.10)       | 0.01<br>(-0.10, 0.10)                        | 0.01<br>(-0.10, 0.10)                                     | 0.05<br>(-0.06, 0.16)       | -0.16<br>(-0.28, -0.04)*                     | 0.05<br>(-0.04, 0.13)                                   | 0.02<br>(-0.09, 0.13)       | 0.08<br>(-0.04, 0.20)                        |
| <b>ALA</b>               |                                                          |                             |                                              |                                                           |                             |                                              |                                                         |                             |                                              |
| <i>Unadjusted</i>        | -0.06<br>(-0.13, 0.02)                                   | -0.05<br>(-0.15, 0.05)      | -0.05<br>(-0.15, 0.05)                       | -0.05<br>(-0.15, 0.05)                                    | 0.03<br>(-0.08, 0.14)       | -0.08<br>(-0.19, 0.03)                       | 0.01<br>(-0.07, 0.09)                                   | -0.04<br>(-0.13, 0.06)      | -0.06<br>(-0.17, 0.05)                       |
| <i>Adjusted</i>          | -0.05<br>(-0.13, 0.03)                                   | -0.03<br>(-0.13, 0.07)      | -0.03<br>(-0.13, 0.07)                       | -0.03<br>(-0.13, 0.07)                                    | 0.05<br>(-0.06, 0.16)       | -0.07<br>(-0.18, 0.05)                       | 0.02<br>(-0.06, 0.10)                                   | -0.04<br>(-0.14, 0.07)      | -0.04<br>(-0.15, 0.07)                       |
| <b>EPA</b>               |                                                          |                             |                                              |                                                           |                             |                                              |                                                         |                             |                                              |
| <i>Unadjusted</i>        | -0.01<br>(-0.09, 0.07)                                   | 0.03<br>(-0.07, 0.13)       | 0.03<br>(-0.07, 0.13)                        | 0.03<br>(-0.07, 0.13)                                     | 0.06<br>(-0.06, 0.18)       | -0.11<br>(-0.23, 0.01)                       | 0.04<br>(-0.04, 0.13)                                   | 0.04<br>(-0.06, 0.15)       | 0.09<br>(-0.03, 0.20)                        |
| <i>Adjusted</i>          | -0.01<br>(-0.08, 0.07)                                   | 0.01<br>(-0.09, 0.11)       | 0.01<br>(-0.09, 0.11)                        | 0.01<br>(-0.09, 0.11)                                     | 0.07<br>(-0.05, 0.19)       | -0.11<br>(-0.23, 0.02)                       | 0.03<br>(-0.06, 0.12)                                   | 0.05<br>(-0.06, 0.15)       | 0.10<br>(-0.02, 0.21)                        |
| <b>DPA</b>               |                                                          |                             |                                              |                                                           |                             |                                              |                                                         |                             |                                              |
| <i>Unadjusted</i>        | -0.09<br>(-0.17, 0.01)*                                  | -0.08<br>(-0.18, 0.01)      | -0.08<br>(-0.18, 0.01)                       | -0.08<br>(-0.18, 0.01)                                    | 0.11<br>(0.01, 0.22)*       | -0.18<br>(-0.29, -0.07)*                     | 0.02<br>(-0.07, 0.10)                                   | 0.05<br>(-0.06, 0.15)       | -0.06<br>(-0.17, 0.05)                       |
| <i>Adjusted</i>          | -0.09<br>(-0.17, -0.02)*                                 | -0.08<br>(-0.18, 0.02)      | -0.08<br>(-0.18, 0.02)                       | -0.08<br>(-0.18, 0.02)                                    | 0.09<br>(-0.02, 0.19)       | -0.17<br>(-0.29, -0.06)*                     | 0.02<br>(-0.07, 0.10)                                   | 0.03<br>(-0.07, 0.14)       | -0.03<br>(-0.15, 0.09)                       |
| <b>DHA</b>               |                                                          |                             |                                              |                                                           |                             |                                              |                                                         |                             |                                              |
| <i>Unadjusted</i>        | -0.02<br>(-0.10, 0.06)                                   | 0.05<br>(-0.05, 0.15)       | 0.05<br>(-0.05, 0.15)                        | 0.05<br>(-0.05, 0.15)                                     | 0.04<br>(-0.07, 0.15)       | -0.12<br>(-0.24, -0.01)*                     | 0.07<br>(-0.02, 0.15)                                   | 0.03<br>(-0.07, 0.13)       | 0.07<br>(-0.05, 0.18)                        |
| <i>Adjusted</i>          | -0.03<br>(-0.11, 0.05)                                   | 0.02<br>(-0.08, 0.12)       | 0.02<br>(-0.08, 0.12)                        | 0.02<br>(-0.08, 0.12)                                     | 0.02<br>(-0.10, 0.13)       | -0.13<br>(-0.25, -0.01)*                     | 0.05<br>(-0.04, 0.13)                                   | 0<br>(-0.11, 0.11)          | 0.08<br>(-0.04, 0.21)                        |

<sup>1</sup>Values are regression coefficients (95% Confidence Interval) that reflect the difference in SDS of infants body mass index and subcutaneous fat mass measures from 1.5 to 24 months per SD change in maternal n-3 PUFA levels. Body mass index = weight/height<sup>2</sup>. Total subcutaneous fat mass = biceps + triceps + suprailiacal + subscapular skinfold thicknesses. Central-to-total subcutaneous fat mass ratio = (suprailiacal + subscapular skinfold thicknesses)/total subcutaneous fat mass.

<sup>2</sup>Adjusted model includes gestational age at blood sampling, maternal age, educational level, parity, pre-pregnancy body mass index, maternal total energy intake, smoking habits and weight gain during pregnancy, folic acid supplement use, gestational diabetes, gestational hypertensive disorders, infants' sex, gestational age-adjusted birth weight standard-deviation scores, breastfeeding duration and timing of introduction of solid foods. \* P-value<0.05.



**Table S6** Association of maternal n-6 PUFA levels and infant subcutaneous fat mass measures at 1.5, 6 and 24 months (N =904)<sup>1,2</sup>

| Maternal n-6 PUFA in SDS | Adiposity measures at 1.5 months in SDS<br>Difference (95% confidence interval) |                             |                                              | Adiposity measures at 6 months in SDS<br>Difference (95% confidence interval) |                             |                                              | Adiposity measures at 24 months in SDS<br>Difference (95% confidence interval) |                             |                                              |
|--------------------------|---------------------------------------------------------------------------------|-----------------------------|----------------------------------------------|-------------------------------------------------------------------------------|-----------------------------|----------------------------------------------|--------------------------------------------------------------------------------|-----------------------------|----------------------------------------------|
|                          | Body mass index                                                                 | Total subcutaneous fat mass | Central-to-total subcutaneous fat mass ratio | Body mass index                                                               | Total subcutaneous fat mass | Central-to-total subcutaneous fat mass ratio | Body mass index                                                                | Total subcutaneous fat mass | Central-to-total subcutaneous fat mass ratio |
| <b>Total</b>             | 0.20<br>(-0.05, 0.09)                                                           | -0.07<br>(-0.14, 0.00)      | -0.06<br>(-0.13, 0.01)                       | -0.01 (-0.08, 0.06)                                                           | 0.01 (-0.06, 0.08)          | 0.04 (-0.03, 0.11)                           | -0.03<br>(-0.13, 0.06)                                                         | 0.09<br>(-0.02, 0.20)       | 0.08<br>(-0.04, 0.19)                        |
| <i>LA</i>                | -0.01<br>(-0.08, 0.06)                                                          | -0.05<br>(-0.12, 0.02)      | -0.03<br>(-0.10, 0.04)                       | -0.03 (-0.10, 0.04)                                                           | 0.03 (-0.04, 0.10)          | 0.03 (-0.04, 0.10)                           | 0.03<br>(-0.06, 0.14)                                                          | 0.08<br>(-0.03, 0.19)       | 0.03<br>(-0.09, 0.14)                        |
| <i>GLA</i>               | 0.02<br>(-0.05, 0.09)                                                           | 0.03<br>(-0.04, 0.11)       | -0.06<br>(-0.14, 0.01)                       | 0.02 (-0.05, 0.09)                                                            | 0.01 (-0.07, 0.07)          | 0.04 (-0.03, 0.11)                           | -0.07<br>(-0.17, 0.03)                                                         | -0.09<br>(-0.20, 0.03)      | 0.08<br>(-0.04, 0.20)                        |
| <i>EDA</i>               | 0.02<br>(-0.05, 0.09)                                                           | 0.07<br>(-0.01, 0.14)       | -0.02<br>(-0.09, 0.06)                       | -0.01 (-0.08, 0.06)                                                           | -0.01 (-0.08, 0.06)         | 0.05 (-0.02, 0.12)                           | 0.03<br>(-0.07, 0.13)                                                          | -0.02<br>(-0.13, 0.09)      | 0.02<br>(-0.09, 0.13)                        |
| <i>DGLA</i>              | 0.06<br>(-0.01, 0.13)                                                           | 0.08<br>(0.01, 0.15)*       | -0.02<br>(-0.09, 0.05)                       | 0.08 (0.01, 0.15)*                                                            | 0.04 (-0.03, 0.11)          | 0.06 (-0.01, 0.13)                           | 0.01<br>(-0.08, 0.11)                                                          | -0.03<br>(-0.14, 0.09)      | 0.06<br>(-0.06, 0.17)                        |
| <i>ARA</i>               | 0.01<br>(-0.06, 0.08)                                                           | -0.06<br>(-0.13, 0.01)      | -0.01<br>(-0.08, 0.06)                       | -0.01 (-0.07, 0.07)                                                           | -0.05 (-0.12, 0.02)         | -0.03 (-0.10, 0.04)                          | -0.11<br>(-0.21, -0.01)*                                                       | 0.02<br>(-0.09, 0.12)       | 0.02<br>(-0.09, 0.13)                        |
| <i>DTA</i>               | 0.05<br>(-0.02, 0.12)                                                           | -0.02<br>(-0.09, 0.05)      | -0.02<br>(-0.10, 0.05)                       | 0.01 (-0.07, 0.07)                                                            | -0.01 (-0.08, 0.06)         | 0.01 (-0.06, 0.08)                           | -0.10<br>(-0.20, 0.01)                                                         | -0.09<br>(-0.20, 0.02)      | 0.04<br>(-0.07, 0.16)                        |

<sup>1</sup>Values are regression coefficients (95% Confidence Interval) that reflect the difference in SDS of infant body mass index and subcutaneous fat mass measures from 1.5 to 24 months per SD change in maternal n-6 PUFA levels. Body mass index = weight/height<sup>2</sup>. Total subcutaneous fat mass = biceps + triceps + suprailiacal + subscapular skinfold thicknesses. Central-to-total subcutaneous fat mass ratio = (suprailiacal + subscapular skinfold thicknesses)/total subcutaneous fat mass.

<sup>2</sup>Models are unadjusted for potential confounders. \*P-value<0.05.

**Table S7** Association of maternal n-6 PUFA levels and change in fat mass measures from 1.5 to 24 months (N =904)<sup>1-2</sup>

| Maternal n-6<br>PUFA in SDS | Change in adiposity mass measures from 1.5 to 6<br>months in SDS |                                   |                                                    | Change in adiposity measures from 1.5 to 24<br>months in SDS |                                   |                                                    | Change in adiposity measures from 6 to 24 months<br>in SDS |                                   |                                                    |
|-----------------------------|------------------------------------------------------------------|-----------------------------------|----------------------------------------------------|--------------------------------------------------------------|-----------------------------------|----------------------------------------------------|------------------------------------------------------------|-----------------------------------|----------------------------------------------------|
|                             | Difference (95% confidence interval)                             |                                   |                                                    | Difference (95% confidence interval)                         |                                   |                                                    | Difference (95% confidence interval)                       |                                   |                                                    |
|                             | Body mass<br>index                                               | Total<br>subcutaneous fat<br>mass | Central-to-total<br>subcutaneous<br>fat mass ratio | Body mass<br>index                                           | Total<br>subcutaneous fat<br>mass | Central-to-total<br>subcutaneous<br>fat mass ratio | Body mass<br>index                                         | Total<br>subcutaneous fat<br>mass | Central-to-total<br>subcutaneous fat<br>mass ratio |
| <b>Total</b>                |                                                                  |                                   |                                                    |                                                              |                                   |                                                    |                                                            |                                   |                                                    |
| <i>Unadjusted</i>           | -0.02<br>(-0.09, 0.06)                                           | 0.07<br>(-0.03, 0.17)             | 0.09<br>(-0.01, 0.19)                              | -0.03<br>(-0.13, 0.06)                                       | 0.09<br>(-0.02, 0.20)             | 0.08<br>(-0.04, 0.19)                              | -0.02<br>(-0.10, 0.07)                                     | 0.05<br>(-0.05, 0.15)             | -0.04<br>(-0.16, 0.07)                             |
| <i>Adjusted</i>             | -0.01<br>(-0.09, 0.07)                                           | 0.09<br>(-0.01, 0.19)             | 0.10<br>(-0.01, 0.20)                              | -0.02<br>(-0.12, 0.08)                                       | 0.10<br>(-0.01, 0.21)             | 0.08<br>(-0.04, 0.20)                              | -0.02<br>(-0.10, 0.07)                                     | 0.05<br>(-0.06, 0.15)             | -0.05<br>(-0.17, 0.07)                             |
| <b>LA</b>                   |                                                                  |                                   |                                                    |                                                              |                                   |                                                    |                                                            |                                   |                                                    |
| <i>Unadjusted</i>           | -0.01<br>(-0.09, 0.06)                                           | 0.09<br>(-0.01, 0.18)             | 0.05<br>(-0.04, 0.15)                              | 0.03<br>(-0.06, 0.14)                                        | 0.08<br>(-0.03, 0.19)             | 0.03<br>(-0.09, 0.14)                              | 0.04<br>(-0.05, 0.12)                                      | 0.04<br>(-0.07, 0.14)             | -0.05<br>(-0.16, 0.06)                             |
| <i>Adjusted</i>             | 0<br>(-0.08, 0.08)                                               | 0.12<br>(0.02, 0.22)*             | 0.06<br>(-0.05, 0.16)                              | 0.04<br>(-0.06, 0.14)                                        | 0.12<br>(0.01, 0.23)*             | 0.03<br>(-0.08, 0.15)                              | 0.03<br>(-0.06, 0.11)                                      | 0.04<br>(-0.07, 0.14)             | -0.03<br>(-0.15, 0.09)                             |
| <b>GLA</b>                  |                                                                  |                                   |                                                    |                                                              |                                   |                                                    |                                                            |                                   |                                                    |
| <i>Unadjusted</i>           | -0.02<br>(-0.10, 0.05)                                           | -0.06<br>(-0.16, 0.05)            | 0.11<br>(0.01, 0.21)*                              | -0.07<br>(-0.17, 0.03)                                       | -0.09<br>(-0.20, 0.03)            | 0.08<br>(-0.04, 0.20)                              | -0.04<br>(-0.12, 0.04)                                     | -0.06<br>(-0.16, 0.05)            | -0.06<br>(-0.17, 0.05)                             |
| <i>Adjusted</i>             | -0.04<br>(-0.12, 0.04)                                           | -0.08<br>(-0.18, 0.03)            | 0.10<br>(-0.01, 0.21)                              | -0.06<br>(-0.16, 0.05)                                       | -0.10<br>(-0.21, 0.02)            | 0.08<br>(-0.05, 0.20)                              | -0.01<br>(-0.10, 0.07)                                     | -0.04<br>(-0.14, 0.07)            | -0.06<br>(-0.17, 0.06)                             |
| <b>EDA</b>                  |                                                                  |                                   |                                                    |                                                              |                                   |                                                    |                                                            |                                   |                                                    |
| <i>Unadjusted</i>           | -0.02<br>(-0.10, 0.06)                                           | -0.08<br>(-0.18, 0.02)            | 0.05<br>(-0.05, 0.15)                              | 0.03<br>(-0.07, 0.13)                                        | -0.02<br>(-0.13, 0.09)            | 0.02<br>(-0.09, 0.13)                              | 0.08<br>(-0.01, 0.16)                                      | 0.06<br>(-0.04, 0.16)             | -0.12<br>(-0.23, -0.01)*                           |
| <i>Adjusted</i>             | -0.01<br>(-0.08, 0.08)                                           | -0.06<br>(-0.16, 0.03)            | 0.06<br>(-0.05, 0.16)                              | 0.04<br>(-0.06, 0.14)                                        | 0.01<br>(-0.10, 0.12)             | 0.02<br>(-0.09, 0.14)                              | 0.08<br>(-0.01, 0.16)                                      | 0.08<br>(-0.02, 0.18)             | -0.12<br>(-0.23, -0.01)*                           |
| <b>DGLA</b>                 |                                                                  |                                   |                                                    |                                                              |                                   |                                                    |                                                            |                                   |                                                    |
| <i>Unadjusted</i>           | 0.01<br>(-0.07, 0.08)                                            | -0.04<br>(-0.14, 0.06)            | 0.08<br>(-0.02, 0.18)                              | 0.01<br>(-0.08, 0.11)                                        | -0.03<br>(-0.14, 0.09)            | 0.06<br>(-0.06, 0.17)                              | 0.01<br>(-0.07, 0.09)                                      | 0.04<br>(-0.06, 0.14)             | -0.07<br>(-0.18, 0.04)                             |
| <i>Adjusted</i>             | 0.01<br>(-0.07, 0.08)                                            | -0.05<br>(-0.15, 0.06)            | 0.10<br>(-0.01, 0.20)                              | 0.02<br>(-0.09, 0.12)                                        | -0.02<br>(-0.14, 0.09)            | 0.04<br>(-0.08, 0.17)                              | 0.03<br>(-0.06, 0.11)                                      | 0.06<br>(-0.05, 0.17)             | -0.13<br>(-0.25, -0.01)*                           |
| <b>ARA</b>                  |                                                                  |                                   |                                                    |                                                              |                                   |                                                    |                                                            |                                   |                                                    |
| <i>Unadjusted</i>           | -0.01<br>(-0.08, 0.07)                                           | -0.02<br>(-0.12, 0.07)            | -0.02<br>(-0.12, 0.08)                             | -0.11<br>(-0.21, -0.01)*                                     | 0.02<br>(-0.09, 0.12)             | 0.02<br>(-0.09, 0.13)                              | -0.09<br>(-0.17, -0.01)*                                   | -0.01<br>(-0.11, 0.09)            | 0.06<br>(-0.05, 0.17)                              |

|                   |                        |                        |                        |                          |                        |                       |                          |                        |                        |
|-------------------|------------------------|------------------------|------------------------|--------------------------|------------------------|-----------------------|--------------------------|------------------------|------------------------|
| <i>Adjusted</i>   | -0.03<br>(-0.11, 0.05) | -0.06<br>(-0.16, 0.04) | -0.03<br>(-0.13, 0.08) | -0.12<br>(-0.22, -0.02)* | -0.05<br>(-0.16, 0.07) | 0.01<br>(-0.11, 0.14) | -0.09<br>(-0.18, -0.01)* | -0.02<br>(-0.13, 0.08) | 0.05<br>(-0.07, 0.17)  |
| <b>DTA</b>        |                        |                        |                        |                          |                        |                       |                          |                        |                        |
| <i>Unadjusted</i> | -0.03<br>(-0.11, 0.04) | -0.02<br>(-0.12, 0.07) | 0.05<br>(-0.05, 0.15)  | -0.10<br>(-0.20, 0.01)   | -0.09<br>(-0.20, 0.02) | 0.04<br>(-0.07, 0.16) | -0.01<br>(-0.10, 0.07)   | -0.09<br>(-0.19, 0.01) | -0.01<br>(-0.12, 0.11) |
| <i>Adjusted</i>   | -0.03<br>(-0.11, 0.05) | -0.01<br>(-0.11, 0.09) | 0.06<br>(-0.05, 0.16)  | -0.03<br>(-0.14, 0.07)   | -0.09<br>(-0.21, 0.02) | 0.04<br>(-0.08, 0.16) | 0.03<br>(-0.06, 0.11)    | -0.08<br>(-0.19, 0.03) | -0.01<br>(-0.13, 0.11) |

<sup>1</sup>Values are regression coefficients (95% Confidence Interval) that reflect the difference in SDS of infants body mass index and subcutaneous fat mass measures from 1.5 to 24 months per SD change in maternal n-6 PUFA levels. Body mass index = weight/height<sup>2</sup>. Total subcutaneous fat mass = biceps + triceps + suprailiacal + subscapular skinfold thicknesses. Central-to-total subcutaneous fat mass ratio = (suprailiacal + subscapular skinfold thicknesses)/total subcutaneous fat mass.

<sup>2</sup>Adjusted model includes gestational age at blood sampling, maternal age, educational level, parity, pre-pregnancy body mass index, maternal total energy intake, smoking habits and weight gain during pregnancy, folic acid supplement use, gestational diabetes, gestational hypertensive disorders, infants' sex, gestational age-adjusted birth weight standard-deviation scores, breastfeeding duration and timing of introduction of solid foods. \* P-value<0.05.

**Table S8** Association of maternal n-6 PUFA levels and change in fat mass measures from 1.5 to 24 months (N =904)<sup>1-2</sup>

| Maternal n-3 PUFA in SDS | Central-to-peripheral subcutaneous fat mass ratio in SDS<br>Difference (95% confidence interval) |                     |                     |                                                  |                                                   |                                                 |
|--------------------------|--------------------------------------------------------------------------------------------------|---------------------|---------------------|--------------------------------------------------|---------------------------------------------------|-------------------------------------------------|
|                          | 1.5 months                                                                                       | 6 months            | 24 months           | Change in fat mass measures from 1.5 to 6 months | Change in fat mass measures from 1.5 to 24 months | Change in fat mass measures from 6 to 24 months |
| <b>Total</b>             | 0.13 (0.05, 0.20)*                                                                               | -0.06 (-0.14, 0.01) | 0.01 (-0.08, 0.08)  | -0.20 (-0.31, -0.09)*                            | -0.16 (-0.29, -0.04)*                             | 0.08 (-0.05, 0.20)                              |
| <i>ALA</i>               | 0.02 (-0.06, 0.09)                                                                               | -0.03 (-0.10, 0.04) | -0.03 (-0.11, 0.05) | -0.05 (-0.16, 0.06)                              | -0.08 (-0.19, 0.04)                               | -0.05 (-0.16, 0.07)                             |
| <i>EPA</i>               | 0.08 (0.01, 0.15)*                                                                               | -0.06 (-0.13, 0.01) | 0.01 (-0.07, 0.09)  | -0.07 (-0.27, 0.14)                              | -0.07 (-0.30, 0.17)                               | 0.09 (-0.15, 0.32)                              |
| <i>DPA</i>               | 0.12 (0.05, 0.19)*                                                                               | -0.01 (-0.08, 0.06) | -0.05 (-0.13, 0.03) | -0.12 (-0.22, -0.02)*                            | -0.18 (-0.30, -0.07)*                             | -0.04 (-0.15, 0.08)                             |
| <i>DHA</i>               | 0.11 (0.04, 0.19)*                                                                               | -0.06 (-0.13, 0.02) | 0.01 (-0.07, 0.10)  | -0.20 (-0.30, -0.08)*                            | -0.14 (-0.26, -0.01)*                             | 0.09 (-0.04, 0.21)                              |

<sup>1</sup>Values are regression coefficients (95% Confidence Interval) that reflect the difference in SDS in central-to-peripheral subcutaneous fat mass ratio at 1.5, 6 and 24 months per SD change in maternal n-3 PUFA levels. Central-to-peripheral subcutaneous fat mass ratio = (suprailiacal + subscapular skinfold thicknesses)/peripheral subcutaneous fat mass.

<sup>2</sup>Models are adjusted for gestational age at blood sampling, maternal age, educational level, parity, pre-pregnancy body mass index, maternal total energy intake, smoking habits and weight gain during pregnancy, folic acid supplement use, gestational diabetes, gestational hypertensive disorders, infants' sex, gestational age-adjusted birth weight standard-deviation scores, breastfeeding duration and timing of introduction of solid foods (for 6 and 24 months). \* P-value<0.05.

**Table S9** Association of maternal n-6 PUFA levels and change in fat mass measures from 1.5 to 24 months (N =904)<sup>1-2</sup>

| Maternal n-6<br>PUFA in SDS | Central-to-peripheral subcutaneous fat mass ratio in SDS<br>Difference (95% confidence interval) |                     |                     |                                                 |                                                         |                                                       |
|-----------------------------|--------------------------------------------------------------------------------------------------|---------------------|---------------------|-------------------------------------------------|---------------------------------------------------------|-------------------------------------------------------|
|                             | 1.5 months                                                                                       | 6 months            | 24 months           | Change in fat mass<br>measures from 1.5 to<br>6 | Change in fat mass<br>measures from 1.5 to<br>24 months | Change in fat mass<br>measures from 6 to<br>24 months |
| <b>Total</b>                | -0.07 (-0.14, 0.01)                                                                              | 0.03 (-0.04, 0.10)  | -0.01 (-0.09, 0.07) | 0.11 (0.01, 0.21)*                              | 0.09 (-0.04, 0.21)                                      | -0.03 (-0.15, 0.08)                                   |
| <i>LA</i>                   | -0.03 (-0.10, 0.05)                                                                              | 0.03 (-0.04, 0.10)  | 0.01 (-0.07, 0.09)  | 0.06 (-0.05, 0.16)                              | 0.04 (-0.08, 0.16)                                      | -0.02 (-0.14, 0.10)                                   |
| <i>GLA</i>                  | -0.06 (-0.14, 0.01)                                                                              | 0.02 (-0.05, 0.09)  | -0.02 (-0.10, 0.06) | 0.09 (-0.01, 0.20)                              | 0.07 (-0.05, 0.19)                                      | -0.06 (-0.18, 0.06)                                   |
| <i>EDA</i>                  | -0.02 (-0.10, 0.05)                                                                              | 0.05 (-0.03, 0.12)  | -0.05 (-0.12, 0.03) | 0.05 (-0.05, 0.16)                              | 0.03 (-0.09, 0.14)                                      | -0.12 (-0.23, -0.01)*                                 |
| <i>DGLA</i>                 | -0.04 (-0.11, 0.04)                                                                              | 0.06 (-0.01, 0.14)  | -0.06 (-0.14, 0.03) | 0.10 (-0.01, 0.20)                              | 0.04 (-0.08, 0.16)                                      | -0.13 (-0.25, -0.01)*                                 |
| <i>ARA</i>                  | -0.02 (-0.10, 0.05)                                                                              | -0.04 (-0.11, 0.04) | 0.01 (-0.08, 0.08)  | -0.02 (-0.13, 0.09)                             | 0.02 (-0.10, 0.14)                                      | 0.06 (-0.06, 0.18)                                    |
| <i>DTA</i>                  | -0.04 (-0.12, 0.03)                                                                              | -0.01, -0.08, 0.07) | -0.05 (-0.13, 0.03) | 0.06 (-0.05, 0.17)                              | 0.04 (-0.08, 0.17)                                      | -0.10 (-0.13, 0.11)                                   |

<sup>1</sup>Values are regression coefficients (95% Confidence Interval) that reflect the difference in SDS in central-to-peripheral subcutaneous fat mass ratio at 1.5, 6 and 24 months per SD change in maternal n-6 PUFA levels. Central-to-peripheral subcutaneous fat mass ratio = (suprailiacal + subscapular skinfold thicknesses)/peripheral subcutaneous fat mass.

<sup>2</sup>Models are adjusted for gestational age at blood sampling, maternal age, educational level, parity, pre-pregnancy body mass index, maternal total energy intake, smoking habits and weight gain during pregnancy, folic acid supplement use, gestational diabetes, gestational hypertensive disorders, infants' sex, gestational age-adjusted birth weight standard-deviation scores, breastfeeding duration and timing of introduction of solid foods (for 6 and 24 months). \* P-value<0.05.

**Table S10** Maternal n-6 PUFA levels and infant subcutaneous fat mass measures at 1.5, 6 and 24 months (N =904)<sup>1-2</sup>

| <b>Maternal PUFAs in SDS</b> | <b>Overweight risk at 24 months<br/>Odds Ratio (95% CI)<sup>1</sup></b> |
|------------------------------|-------------------------------------------------------------------------|
| <b>Total n-3 PUFA</b>        | 1.06 (0.84, 1.33)                                                       |
| <i>ALA</i>                   | 1.12 (0.90, 1.39)                                                       |
| <i>EPA</i>                   | 1.08 (0.86, 1.34)                                                       |
| <i>DPA</i>                   | 0.86 (0.67, 1.09)                                                       |
| <i>DHA</i>                   | 1.07 (0.85, 1.35)                                                       |
| <b>Total n-6 PUFA</b>        | 1.04 (0.83, 1.30)                                                       |
| <i>LA</i>                    | 1.20 (0.10, 1.49)                                                       |
| <i>GLA</i>                   | 0.89 (0.71, 1.14)                                                       |
| <i>EDA</i>                   | 1.22 (0.10, 1.49)                                                       |
| <i>DGLA</i>                  | 1.18 (0.94, 1.47)                                                       |
| <i>ARA</i>                   | 0.74 (0.59, 0.92)*                                                      |
| <i>DTA</i>                   | 0.82 (0.65, 1.05)                                                       |

<sup>1</sup>Values are odds ratio (95% Confidence Interval) that reflect the risk of overweight at 24 months per SD change in maternal n-3 and n-6 PUFA levels.

Models are adjusted for gestational age at blood sampling, maternal age, educational level, parity, pre-pregnancy body mass index, maternal total energy intake, smoking habits and weight gain during pregnancy, folic acid supplement use, gestational diabetes, gestational hypertensive disorders, infants' sex, gestational age-adjusted birth weight standard-deviation scores, breastfeeding duration and timing of introduction of solid foods. \*P-value<0.05.
